# Supplementary material
Source: PubMed Central journal article supplement (PMC2730641)
Supplement: NIHMS53914-supplement-Spplementary_data.pdf [file NIHMS53914-supplement-Spplementary_data.pdf]

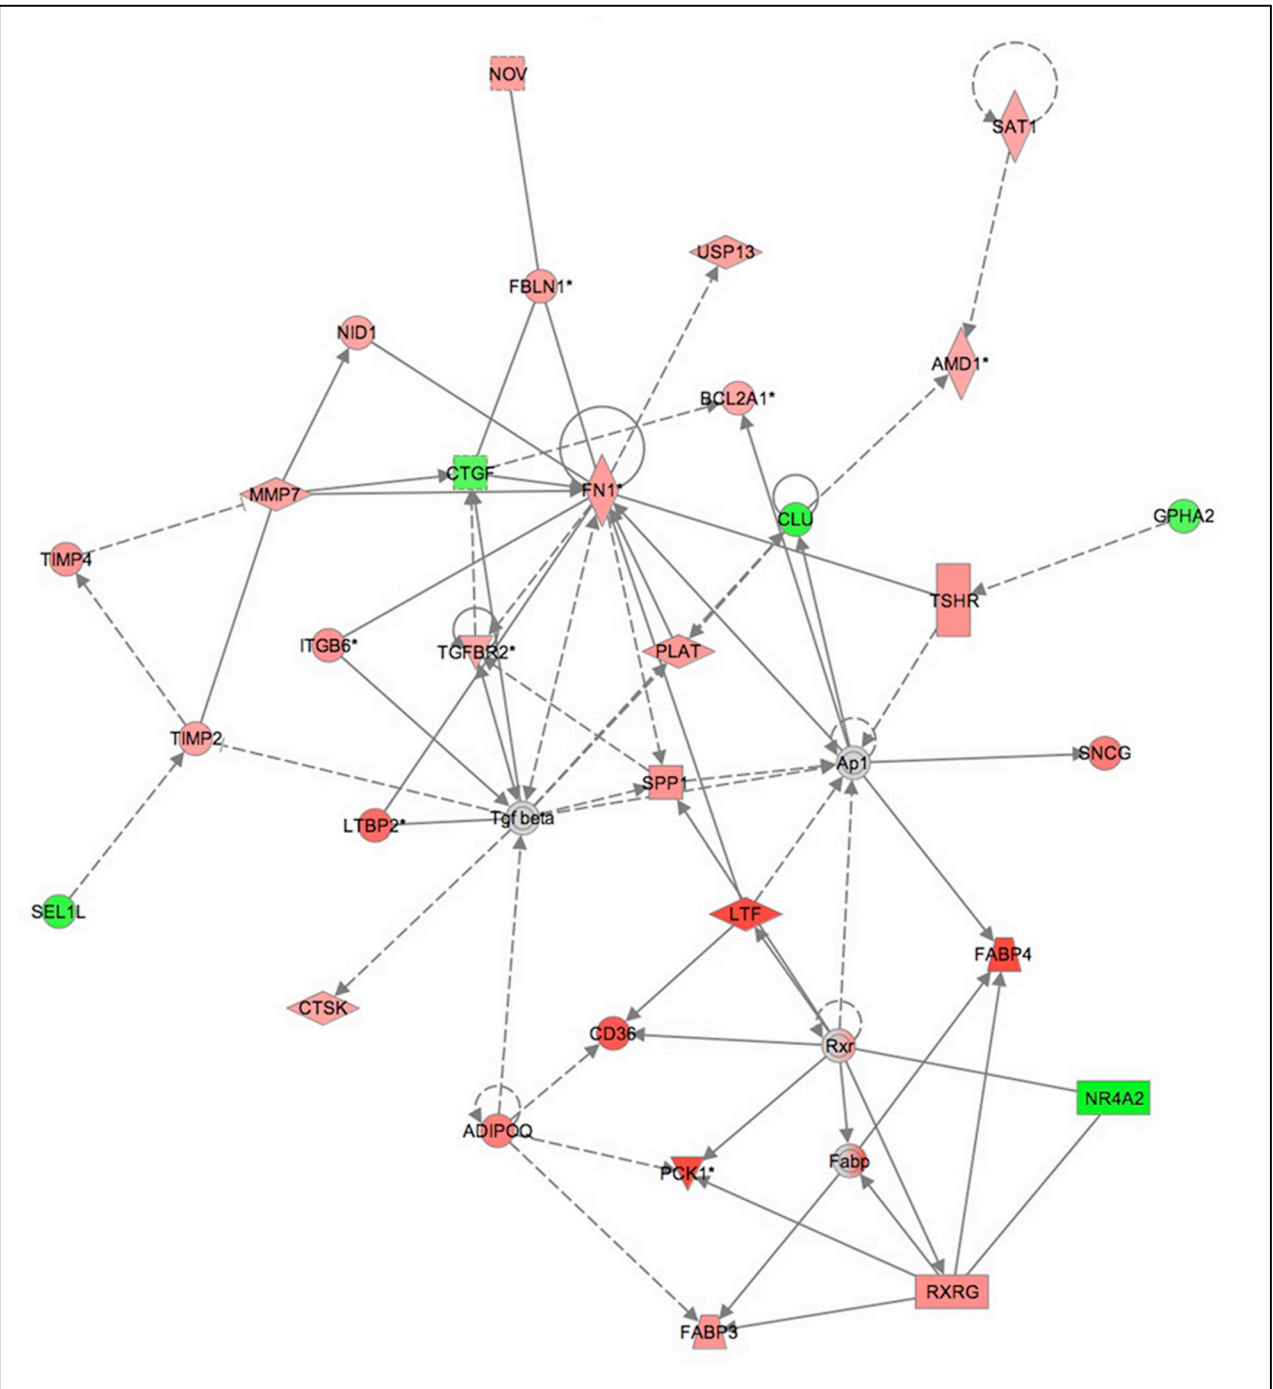

**Supplementary data figure 1: Fig. 5A. Network 2.**

The network is a graphical representation of the molecular relationships between genes or gene products (Ingenuity® Systems, [www.ingenuity.com](http://www.ingenuity.com)). Genes or gene products are represented as nodes, and the biological relationship between two nodes is represented as an edge (line). All edges are supported by at least 1 reference from the literature, from a textbook, or from canonical information stored in the Ingenuity Pathways Knowledge Base. The node color indicates up- (red) or down- (green) regulation. Nodes are displayed using various shapes that represent the functional class of the gene product.

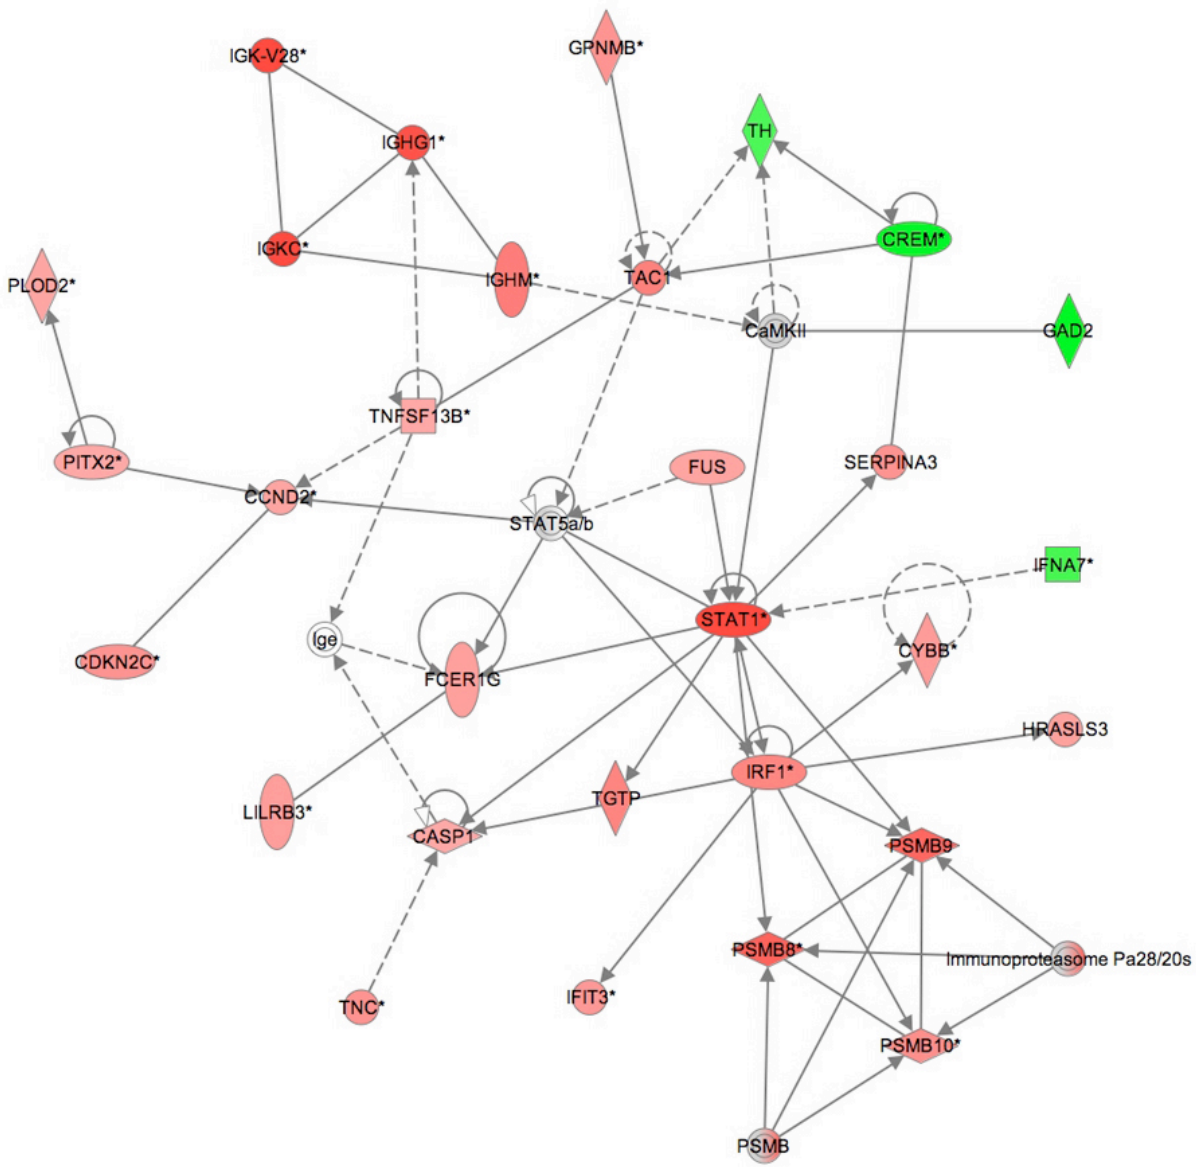

Supplementary data figure 2: Fig. 5A. Network 3

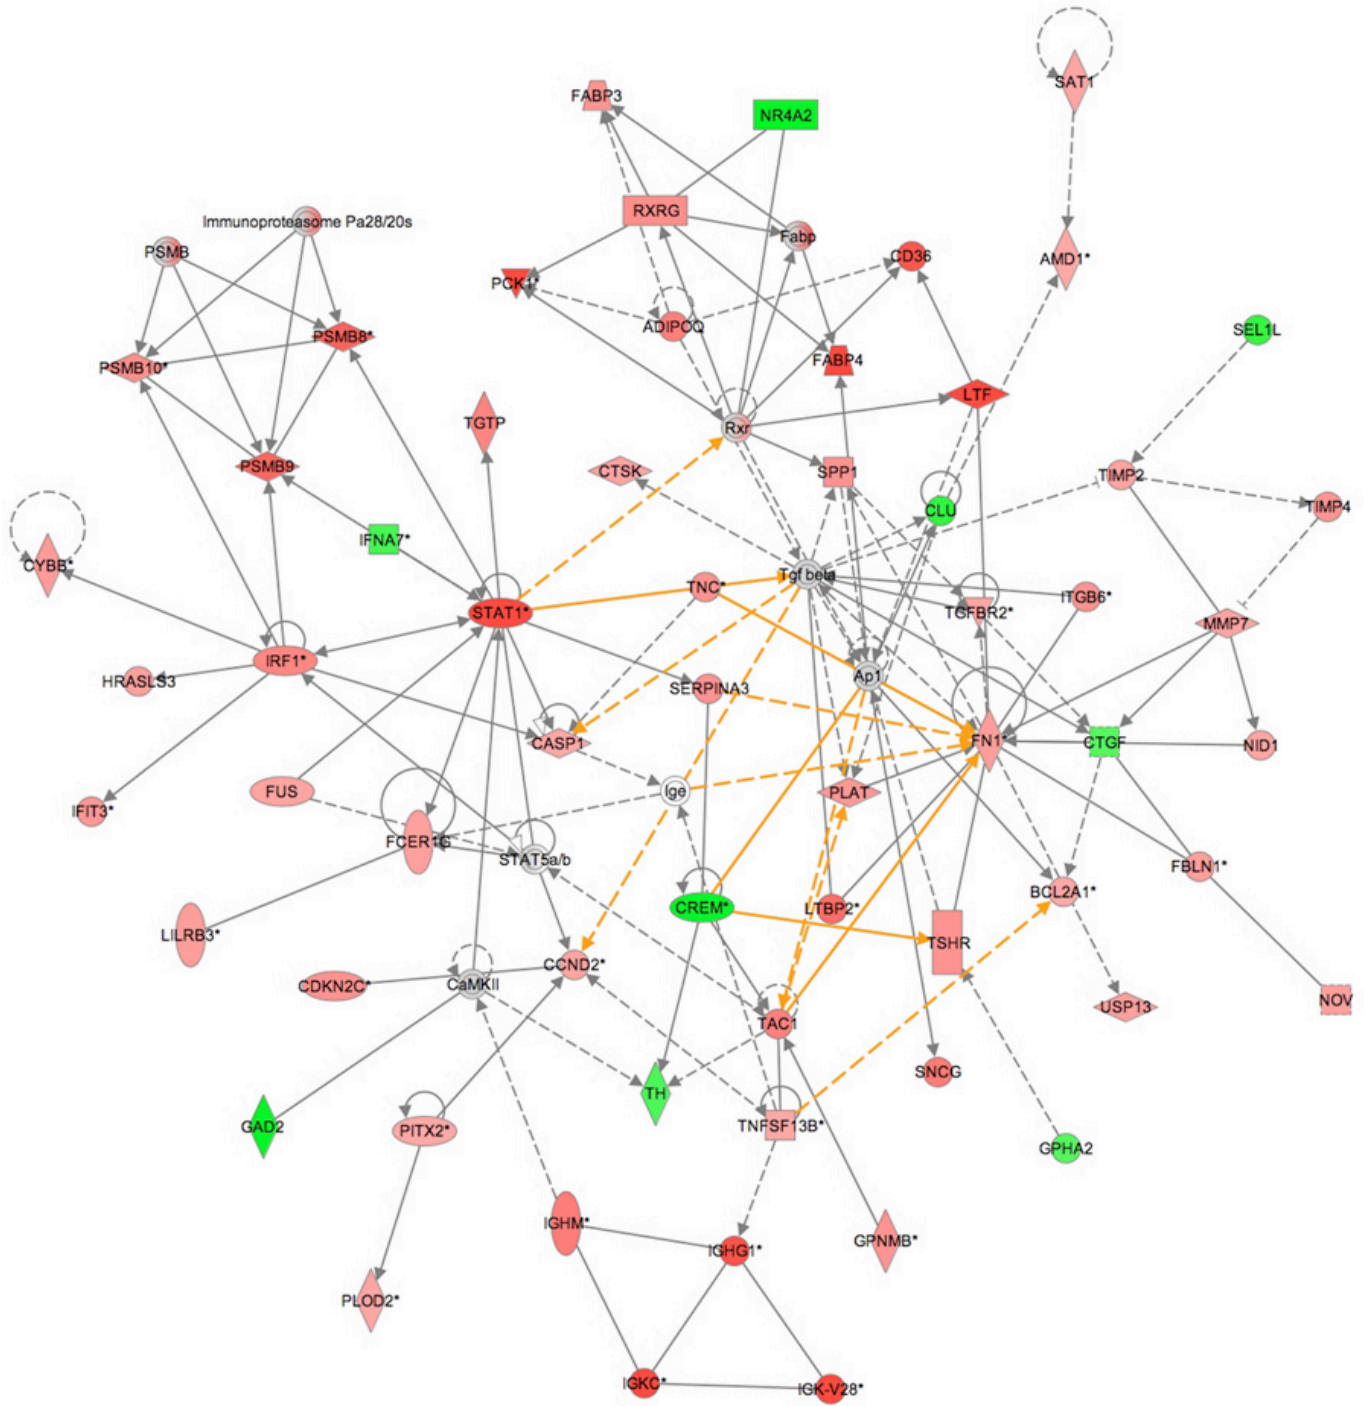

Supplementary data figure 3: Fig. 5A. Network 2&3 merge

**Supplemental Table 1. Prostate cancer-related genes**

| Name     | Description                                       | Fold Change | p-value | Entrez Gene ID (Human) |
|----------|---------------------------------------------------|-------------|---------|------------------------|
| ACTC1    | actin, alpha, cardiac muscle 1                    | 4.023       | 0.018   | 70                     |
| AGTR1    | angiotensin II receptor, type 1                   | 2.536       | 0.009   | 185                    |
| AMD1     | adenosylmethionine decarboxylase 1                | 1.515       | 0.013   | 262                    |
| APOD     | apolipoprotein D                                  | 2.831       | 0.02    | 347                    |
| ARHGDI2B | Rho GDP dissociation inhibitor (GDI) beta         | 1.528       | 0.016   | 397                    |
| C3       | complement component 3                            | 1.77        | 0.005   | 718                    |
| C1R      | complement component 1, r subcomponent            | -1.729      | 0.046   | 715                    |
| CD74     | CD74 molecule                                     | 1.906       | 0.031   | 972                    |
| CFH      | complement factor H                               | 1.69        | 0.002   | 3075                   |
| CLU      | clusterin                                         | -1.764      | 0.009   | 1191                   |
| EDNRB    | endothelin receptor type B                        | 1.64        | 0.005   | 1910                   |
| EPHA4    | EPH receptor A4                                   | 1.535       | 0.016   | 2043                   |
| FABP4    | fatty acid binding protein 4, adipocyte           | 3.294       | 0.003   | 2167                   |
| GBP2     | guanylate binding protein 2, interferon-inducible | 1.852       | 0.015   | 2634                   |
| GPX3     | glutathione peroxidase 3 (plasma)                 | 1.693       | 0.026   | 2878                   |
| HDAC9    | histone deacetylase 9                             | 2.022       | 0.002   | 9734                   |
| HDAC7A   | histone deacetylase 7A                            | -1.518      | 0.012   | 51564                  |
| IBSP     | integrin-binding sialoprotein (bone sialoprotein) | 3.13        | 0.001   | 3381                   |
| IGF1     | insulin-like growth factor 1 (somatomedin C)      | 1.614       | 0.01    | 3479                   |
| IRF1     | interferon regulatory factor 1                    | 2.06        | 0.004   | 3659                   |
| KLK3     | kallikrein-related peptidase 3                    | 1.845       | 0.005   | 354                    |
| KRT7     | keratin 7                                         | 1.922       | 0.002   | 3855                   |
| LTF      | lactotransferrin                                  | 12.049      | 0.013   | 4057                   |
| MMP7     | matrix metalloproteinase 7 (matrilysin, uterine)  | 1.608       | 0.013   | 4316                   |
| PLEKHB1  | pleckstrin homology domain containing, family B   | 1.534       | 0.007   | 58473                  |
| PPARG    | peroxisome proliferator-activated receptor gamma  | 2.088       | 0.006   | 5468                   |
| PSAT1    | phosphoserine aminotransferase 1                  | -1.64       | 0.025   | 29968                  |
| RNASEL   | ribonuclease L                                    | 1.631       | 0.007   | 6041                   |
| SAT1     | spermidine/spermine N1-acetyltransferase 1        | 1.555       | 0.012   | 6303                   |
| SERPINB1 | serpin peptidase inhibitor                        | 1.886       | 0.006   | 1992                   |
| SIM2     | single-minded homolog 2 (Drosophila)              | 3.014       | 0.024   | 6493                   |
| SPP1     | secreted phosphoprotein 1                         | 1.863       | 0.025   | 6696                   |
| WFDC2    | WAP four-disulfide core domain 2                  | 1.941       | 0.004   | 10406                  |

**Supplemental Table 2. Inflammation-related genes**

| Name    | Description                                                 | Fold Change | p-value | Entrez Gene ID (Human) |
|---------|-------------------------------------------------------------|-------------|---------|------------------------|
| ABCB4   | ATP-binding cassette, sub-family B (MDR/TAP)                | 2.099       | 0.036   | 5244                   |
| ARG1    | arginase, liver                                             | 1.542       | 0.019   | 383                    |
| C3      | complement component 3                                      | 1.77        | 0.005   | 718                    |
| C1QA    | complement component 1, q subcomponent, A chain             | 1.504       | 0.007   | 712                    |
| C4B     | complement component 4B (Chido blood group)                 | 2.211       | 0.003   | 721                    |
| CASP1   | caspase 1                                                   | 1.502       | 0.027   | 834                    |
| CCL11   | chemokine (C-C motif) ligand 11                             | 1.984       | 0.047   | 6356                   |
| CD1D    | CD1d molecule                                               | 2.033       | 0.009   | 912                    |
| CFH     | complement factor H                                         | 1.69        | 0.002   | 3075                   |
| CLU     | clusterin                                                   | -1.764      | 0.009   | 1191                   |
| CTSS    | cathepsin S                                                 | 1.872       | 0.009   | 1520                   |
| CYBB    | cytochrome b-245, beta polypeptide                          | 1.731       | 0.003   | 1536                   |
| FCER1G  | Fc fragment of IgE                                          | 1.661       | 0.007   | 2207                   |
| GAD2    | glutamate decarboxylase 2                                   | -2.445      | 0.001   | 2572                   |
| HPR     | haptoglobin-related protein                                 | 2.722       | 0       | 3250                   |
| HSPA5   | heat shock 70kDa protein 5                                  | -2.209      | 0.002   | 3309                   |
| IGF1    | insulin-like growth factor 1                                | 1.614       | 0.01    | 3479                   |
| IGHM    | immunoglobulin heavy constant mu                            | 2.226       | 0.002   | 3507                   |
| ITGB1   | integrin, beta 1                                            | -1.591      | 0.018   | 3688                   |
| ITGB2   | integrin, beta 2                                            | 1.586       | 0.013   | 3689                   |
| LEP     | leptin                                                      | 2.678       | 0.016   | 3952                   |
| LGALS3  | lectin, galactoside-binding, soluble, 3                     | 2.373       | 0.007   | 3958                   |
| LTC4S   | leukotriene C4 synthase                                     | 1.787       | 0.038   | 4056                   |
| LTF     | lactotransferrin                                            | 12.049      | 0.013   | 4057                   |
| MBP     | myelin basic protein                                        | 1.763       | 0.043   | 4155                   |
| MME     | membrane metallo-endopeptidase                              | 1.759       | 0.005   | 4311                   |
| PLA2G7  | phospholipase A2, group VII                                 | 1.823       | 0.007   | 7941                   |
| PLAT    | plasminogen activator, tissue                               | 1.775       | 0.005   | 5327                   |
| PPARG   | peroxisome proliferator-activated receptor gamma            | 2.088       | 0.006   | 5468                   |
| PPT2    | palmitoyl-protein thioesterase 2                            | -1.554      | 0.014   | 9374                   |
| PTGS1   | prostaglandin-endoperoxide synthase 1                       | -1.51       | 0.021   | 5742                   |
| RASGRP1 | RAS guanyl releasing protein 1                              | -2.333      | 0.023   | 10125                  |
| SFTPD   | surfactant, pulmonary-associated protein D                  | 1.554       | 0.012   | 6441                   |
| SPP1    | secreted phosphoprotein 1                                   | 1.863       | 0.025   | 6696                   |
| STAT1   | signal transducer and activator of transcription 1, 91kDa   | 3.033       | 0.012   | 6772                   |
| SYVN1   | synovial apoptosis inhibitor 1, synoviolin                  | -2.492      | 0.001   | 84447                  |
| TAC1    | tachykinin, precursor 1                                     | 2.161       | 0.001   | 6863                   |
| TAP1    | transporter 1, ATP-binding cassette, sub-family B (MDR/TAP) | 2.059       | 0.01    | 6890                   |
| TGFBR2  | transforming growth factor, beta receptor II                | 1.548       | 0.014   | 7048                   |
| TGM2    | transglutaminase 2                                          | 1.519       | 0.01    | 7052                   |
| TLR2    | toll-like receptor 2                                        | 1.584       | 0.01    | 7097                   |
| TNFSF10 | tumor necrosis factor (ligand) superfamily, member 10       | 1.627       | 0.017   | 8743                   |
| TYROBP  | TYRO protein tyrosine kinase binding protein                | 1.827       | 0.002   | 7305                   |

**Supplemental Table 3. Genes in network 2 and 3**

| Name     | Description                                                 | Fold Change | p-value | Network | Entrez Gene ID (Human) |
|----------|-------------------------------------------------------------|-------------|---------|---------|------------------------|
| ADIPOQ   | adiponectin                                                 | 2.19        | 0.02    | 2       | 9370                   |
| BCL2A1   | BCL2-related protein A1                                     | 1.507       | 0.027   | 2       | 597                    |
| CD36     | CD36 molecule                                               | 2.805       | 0.004   | 2       | 948                    |
| CLU      | clusterin                                                   | -1.764      | 0.009   | 2       | 1191                   |
| CTGF     | connective tissue growth factor                             | -1.534      | 0.006   | 2       | 1490                   |
| CTSK     | cathepsin K                                                 | 1.585       | 0.009   | 2       | 1513                   |
| FABP3    | fatty acid binding protein 3                                | 1.836       | 0.014   | 2       | 2170                   |
| FABP4    | fatty acid binding protein 4, adipocyte                     | 3.294       | 0.003   | 2       | 2167                   |
| FBLN1    | fibulin 1                                                   | 1.657       | 0.003   | 2       | 2192                   |
| FN1      | fibronectin 1                                               | 1.694       | 0.004   | 2       | 2335                   |
| GPHA2    | glycoprotein hormone alpha 2                                | -1.518      | 0.02    | 2       | 170589                 |
| ITGB6    | integrin, beta 6                                            | 1.855       | 0.003   | 2       | 3694                   |
| LTBP2    | latent transforming growth factor beta binding protein 2    | 2.492       | 0.001   | 2       | 4053                   |
| MMP7     | matrix metalloproteinase 7                                  | 1.608       | 0.013   | 2       | 4316                   |
| NID1     | nidogen 1                                                   | 1.563       | 0.017   | 2       | 4811                   |
| NOV      | nephroblastoma overexpressed gene                           | 1.66        | 0.015   | 2       | 4856                   |
| NR4A2    | nuclear receptor subfamily 4                                | -2.244      | 0.002   | 2       | 4929                   |
| PLAT     | plasminogen activator, tissue                               | 1.775       | 0.005   | 2       | 5327                   |
| RXRG     | retinoid X receptor, gamma                                  | 1.93        | 0.002   | 2       | 6258                   |
| SAT1     | spermidine/spermine N1-acetyltransferase 1                  | 1.555       | 0.012   | 2       | 6303                   |
| SPP1     | secreted phosphoprotein 1                                   | 1.863       | 0.025   | 2       | 6696                   |
| TGFBR2   | transforming growth factor, beta receptor II                | 1.548       | 0.014   | 2       | 7048                   |
| TIMP2    | TIMP metalloproteinase inhibitor 2                          | 1.593       | 0.008   | 2       | 7077                   |
| TIMP4    | TIMP metalloproteinase inhibitor 4                          | 1.831       | 0.019   | 2       | 7079                   |
| USP13    | ubiquitin specific peptidase 13 (isopeptidase T-3)          | 1.657       | 0.02    | 2       | 8975                   |
| CASP1    | caspase 1, apoptosis-related cysteine peptidase             | 1.502       | 0.027   | 3       | 834                    |
| CCND2    | cyclin D2                                                   | 1.569       | 0.004   | 3       | 894                    |
| CDKN2C   | cyclin-dependent kinase inhibitor 2C                        | 1.874       | 0.001   | 3       | 1031                   |
| CREM     | cAMP responsive element modulator                           | -1.936      | 0.001   | 3       | 1390                   |
| CYBB     | cytochrome b-245, beta polypeptide                          | 1.731       | 0.003   | 3       | 1536                   |
| FCER1G   | Fc fragment of IgE                                          | 1.661       | 0.007   | 3       | 2207                   |
| FUS      | fusion                                                      | 1.605       | 0.004   | 3       | 2521                   |
| GAD2     | glutamate decarboxylase 2                                   | -2.445      | 0.001   | 3       | 2572                   |
| GPNMB    | glycoprotein nmb                                            | 1.857       | 0.009   | 3       | 10457                  |
| HRASLS3  | HRAS-like suppressor 3                                      | 1.626       | 0.011   | 3       | 11145                  |
| IFIT3    | interferon-induced protein with tetratricopeptide repeats 3 | 1.782       | 0.019   | 3       | 3437                   |
| IFNA7    | interferon, alpha 7                                         | -1.628      | 0.007   | 3       | 3444                   |
| IGHM     | immunoglobulin heavy constant mu                            | 2.226       | 0.002   | 3       | 3507                   |
| IGKC     | immunoglobulin kappa constant                               | 3.391       | 0.001   | 3       | 3514                   |
| IRF1     | interferon regulatory factor 1                              | 2.06        | 0.004   | 3       | 3659                   |
| LILRB3   | leukocyte immunoglobulin-like receptor                      | 1.688       | 0.004   | 3       | 11025                  |
| PITX2    | paired-like homeodomain transcription factor 2              | 1.51        | 0.028   | 3       | 5308                   |
| PLOD2    | procollagen-lysine, 2-oxoglutarate 5-dioxygenase 2          | 1.553       | 0.02    | 3       | 5352                   |
| PSMB8    | proteasome subunit, beta type, 8                            | 2.619       | 0.01    | 3       | 5696                   |
| PSMB9    | proteasome subunit, beta type, 9                            | 2.569       | 0.002   | 3       | 5698                   |
| PSMB10   | proteasome subunit, beta type, 10                           | 1.934       | 0.001   | 3       | 5699                   |
| SERPINA3 | serpin peptidase inhibitor, clade A                         | 1.876       | 0.001   | 3       | 12                     |
| STAT1    | signal transducer and activator of transcription 1          | 3.033       | 0.012   | 3       | 6772                   |
| TH       | tyrosine hydroxylase                                        | -1.586      | 0.008   | 3       | 7054                   |
| TNC      | tenascin C (hexabrachion)                                   | 1.873       | 0.004   | 3       | 3371                   |
| TNFSF13B | tumor necrosis factor 13b                                   | 1.518       | 0.012   | 3       | 10673                  |

**Supplemental Table 4.** The expression levels of multiple genes in NF- $\kappa$ B-mediated pathway are elevated in the prostate gland of Vav3 transgenic mice.

| Oligo ID  | Accession | Gene Name                                  | symbol  | TG/WT | p.value   |
|-----------|-----------|--------------------------------------------|---------|-------|-----------|
| mMR026458 | NM_009742 | B-cell leukemia/lymphoma 2A1a              | Bcl2a1a | 1.51  | 0.0271643 |
| mMR026911 | NM_007534 | B-cell leukemia/lymphoma 2A1b              | Bcl2a1b | 1.43  | 0.0564063 |
| mMR028756 | NM_007536 | B-cell leukemia/lymphoma 2A1d              | Bcl2a1d | 1.35  | 0.0967898 |
| mMR029813 | NM_011124 | chemokine (C-C motif) ligand 21b           | Ccl21b  | 1.34  | 0.0244349 |
| mMR029936 | NM_023052 | chemokine (C-C motif) ligand 21c           | Ccl21c  | 1.51  | 0.0065963 |
| mMC015327 | NM_009139 | chemokine (C-C motif) ligand 6             | Ccl6    | 1.59  | 0.0445995 |
| mMC018241 | NM_021443 | chemokine (C-C motif) ligand 8             | Ccl8    | 3.19  | 0.001913  |
| mMC011417 | NM_011338 | chemokine (C-C motif) ligand 9             | Ccl9    | 1.93  | 0.0010844 |
| mMC019538 | NM_009917 | chemokine (C-C motif) receptor 5           | Ccr5    | 1.41  | 0.0274764 |
| mMC009388 | NM_009987 | chemokine (C-X3-C) receptor 1              | Cx3cr1  | 1.76  | 0.0075135 |
| mMC009720 | NM_018866 | chemokine (C-X-C motif) ligand 13          | Cxcl13  | 1.82  | 0.0049747 |
| mMR030424 | NM_019568 | chemokine (C-X-C motif) ligand 14          | Cxcl14  | 1.47  | 0.025979  |
| mMC011383 | NM_019568 | chemokine (C-X-C motif) ligand 14          | Cxcl14  | 1.33  | 0.0520974 |
| mMC002432 | NM_011339 | chemokine (C-X-C motif) ligand 15          | Cxcl15  | 1.87  | 0.0257997 |
| mMC012732 | NM_019932 | chemokine (C-X-C motif) ligand 4           | Cxcl4   | 1.28  | 0.0460845 |
| mMC016261 | NM_023785 | chemokine (C-X-C motif) ligand 7           | Cxcl7   | 1.54  | 0.0807087 |
| mMR028932 | NM_008599 | chemokine (C-X-C motif) ligand 9           | Cxcl9   | 2.37  | 0.0154008 |
| mMC016480 | NM_009910 | chemokine (C-X-C motif) receptor 3         | Cxcr3   | 1.29  | 0.0648933 |
| mMC008605 | NM_007778 | colony stimulating factor 1                | Csf1    | 1.35  | 0.0322997 |
| mMC012508 | NM_007779 | colony stimulating factor 1 receptor       | Csf1r   | 1.50  | 0.0103233 |
| mMA032118 | NM_010140 | Eph receptor A3                            | Epha3   | 1.59  | 0.0230165 |
| mMR028978 | NM_007936 | Eph receptor A4                            | Epha4   | 1.54  | 0.0164085 |
| mMC016646 | NM_007912 | epidermal growth factor receptor           | Egfr    | 1.27  | 0.0640235 |
| mMA034894 | BC030485  | fibroblast growth factor 12                | Fgf12   | 1.43  | 0.0249133 |
| mMC007281 | NM_010207 | fibroblast growth factor receptor 2        | Fgfr2   | 1.30  | 0.0443986 |
| mMC007222 | NM_007836 | growth arrest-DNA-damage-inducible 45a     | Gadd45a | 1.45  | 0.0111434 |
| mMA032885 | M64404    | interleukin 1 receptor antagonist          | Il1rn   | 1.25  | 0.0953925 |
| mMC016450 | NM_008348 | interleukin 10 receptor, alpha             | Il10ra  | 1.33  | 0.0837505 |
| mMC020667 | NM_008349 | interleukin 10 receptor, beta              | Il10rb  | 1.46  | 0.0164681 |
| mMR028239 | NM_010549 | interleukin 11 receptor, alpha chain 1     | Il11ra1 | 1.25  | 0.0961248 |
| mMR026687 | NM_008351 | interleukin 12a                            | Il12a   | 1.32  | 0.0499481 |
| mMC013213 | NM_008356 | interleukin 13 receptor, alpha 2           | Il13ra2 | 1.30  | 0.052852  |
| mMC014670 | NM_145826 | interleukin 17 receptor E                  | Il17re  | 1.42  | 0.0469731 |
| mMA035644 | AK008452  | interleukin 18 binding protein             | Il18bp  | 1.24  | 0.0956273 |
| mMC022255 | NM_174851 | interleukin 28 receptor alpha              | Il28ra  | 1.28  | 0.0798595 |
| mMC017079 | NM_010557 | interleukin 4 receptor, alpha              | Il4ra   | 1.31  | 0.0535764 |
| mMC023706 | NM_008372 | interleukin 7 receptor                     | Il7r    | 1.43  | 0.025404  |
| mMC006889 | NM_019676 | phospholipase C, delta 1                   | Plcd1   | 1.29  | 0.0713723 |
| mMC025803 | NM_019588 | phospholipase C, epsilon 1                 | Plce1   | 1.47  | 0.0140237 |
| mMR030940 | NM_013880 | phospholipase C-like 2                     | Plcl2   | 1.41  | 0.0228803 |
| mMA031851 | NM_009369 | transforming growth factor, b induced      | Tgfbi   | 1.61  | 0.0068306 |
| mMA032934 | NM_009371 | transforming growth factor, b receptor II  | Tgfr2   | 1.55  | 0.0139771 |
| mMC020668 | NM_011578 | transforming growth factor, b receptor III | Tgfr3   | 1.29  | 0.0806209 |
| mMC011682 | NM_009396 | tumor necrosis factor, a-induced protein 2 | Tnfaip2 | 1.62  | 0.0078088 |
| mMC025060 | NM_134131 | tumor necrosis factor, a-induced protein 8 | Tnfaip8 | 1.38  | 0.043358  |
| mMC012574 | NM_009505 | vascular endothelial growth factor A       | Vegfa   | 1.23  | 0.085429  |
